# Supplementary material for: Photo-responsive liquid crystalline polymer from a renewable furfural derivative of dimethyl 2,5-furandicarboxylate via catalytic carbonylative esterification
Source: Royal Society of Chemistry journal article supplement (doi:10.1039/d2tc03965f), 2022-01-01
Supplement: d2tc03965f1.pdf [file d2tc03965f1.pdf]

*Supporting Information for*

**Photo-responsive liquid crystalline polymer from renewable furfural derivatives of dimethyl 2,5-furandicarboxylate via catalytic carbonylative esterification**

Tian Wang,<sup>†</sup> Jinlian Zhu,<sup>†</sup> Kaiwei Zhang, Jing Wang, Yonggui Liao,<sup>\*</sup> Guochuan Yin<sup>\*</sup>, and Xiaolin Xie

Key Laboratory of Material Chemistry for Energy Conversion and Storage, Ministry of Education, Hubei Engineering Research Center for Biomaterials and Medical Protective Materials, Hubei Key Laboratory of Materials Chemistry and Service Failure, School of Chemistry and Chemical Engineering, Huazhong University of Science and Technology, Wuhan 430074, China

**Contents**

|                                                                                                                                                           |   |
|-----------------------------------------------------------------------------------------------------------------------------------------------------------|---|
| <b>Table S1</b> The influence of ligand loadings on the catalytic efficiency in DMFD synthesis.....                                                       | 2 |
| <b>Table S2</b> The influence of temperature on the catalytic efficiency in DMFD synthesis .....                                                          | 2 |
| <b>Fig. S1</b> <sup>1</sup> H and <sup>13</sup> C NMR spectra of methyl 5-bromofuroate .....                                                              | 3 |
| <b>Fig. S2.</b> <sup>1</sup> H and <sup>13</sup> C NMR spectra of DMFD .....                                                                              | 4 |
| <b>Fig. S3</b> <sup>1</sup> H and <sup>13</sup> C NMR spectra of Azo-C <sub>12</sub> .....                                                                | 5 |
| <b>Fig. S4</b> ESI-MS spectrum of Azo-C <sub>12</sub> .....                                                                                               | 6 |
| <b>Fig. S5</b> <sup>1</sup> H NMR spectrum of PAzo-DMFD.....                                                                                              | 7 |
| <b>Fig. S6</b> UV-Vis spectra of PAzo-DMFD film before and after UV light and then visible light.....                                                     | 7 |
| <b>Fig. S7</b> <sup>1</sup> H-NMR spectra of PAzo-DMFD in CDCl <sub>3</sub> before and after 365 nm UV irradiation .....                                  | 8 |
| <b>Fig. S8</b> POM images of PAzo-DMFD upon UV light irradiation at 50 °C and upon heating to 120 °C and then cooling to 50 °C after UV irradiation. .... | 8 |

**Table S1** The influence of ligand loadings on the catalytic efficiency in DMFD synthesis

| Entry | Ligand | Conv.(%) | Yield (%) |                |
|-------|--------|----------|-----------|----------------|
|       |        |          | DMFD      | methyl-furoate |
| 1     | 0      | 21       | 11        | 9              |
| 2     | 5%     | 85       | 80        | 5              |
| 3     | 10%    | 93       | 89        | 3              |
| 4     | 15%    | 98       | 95        | 2              |
| 5     | 20%    | 98       | 96        | 2              |

Conditions: methyl 5-bromofuroate (0.2 mmol), 5% PdCl<sub>2</sub> loading (10 μmol), Sphos, Et<sub>3</sub>N (0.6 mmol), CH<sub>3</sub>OH (2 mL), 70 °C, 24 h, CO balloon.

**Table S2** The influence of temperature on the catalytic efficiency in DMFD synthesis

| Entry | <i>T</i> (°C) | Conv.(%) | Yield (%) |                |
|-------|---------------|----------|-----------|----------------|
|       |               |          | DMFD      | methyl-furoate |
| 1     | 30            | 16       | 5         | 10             |
| 2     | 40            | 20       | 12        | 6              |
| 3     | 50            | 45       | 41        | 3              |
| 4     | 60            | 92       | 90        | 2              |
| 5     | 70            | 98       | 95        | 2              |

Conditions: methyl 5-bromofuroate (0.2 mmol), PdCl<sub>2</sub> (10 μmol), Sphos (30 μmol), TEA (0.6 mmol), CH<sub>3</sub>OH (2 mL), 24 h, *T*, CO balloon.

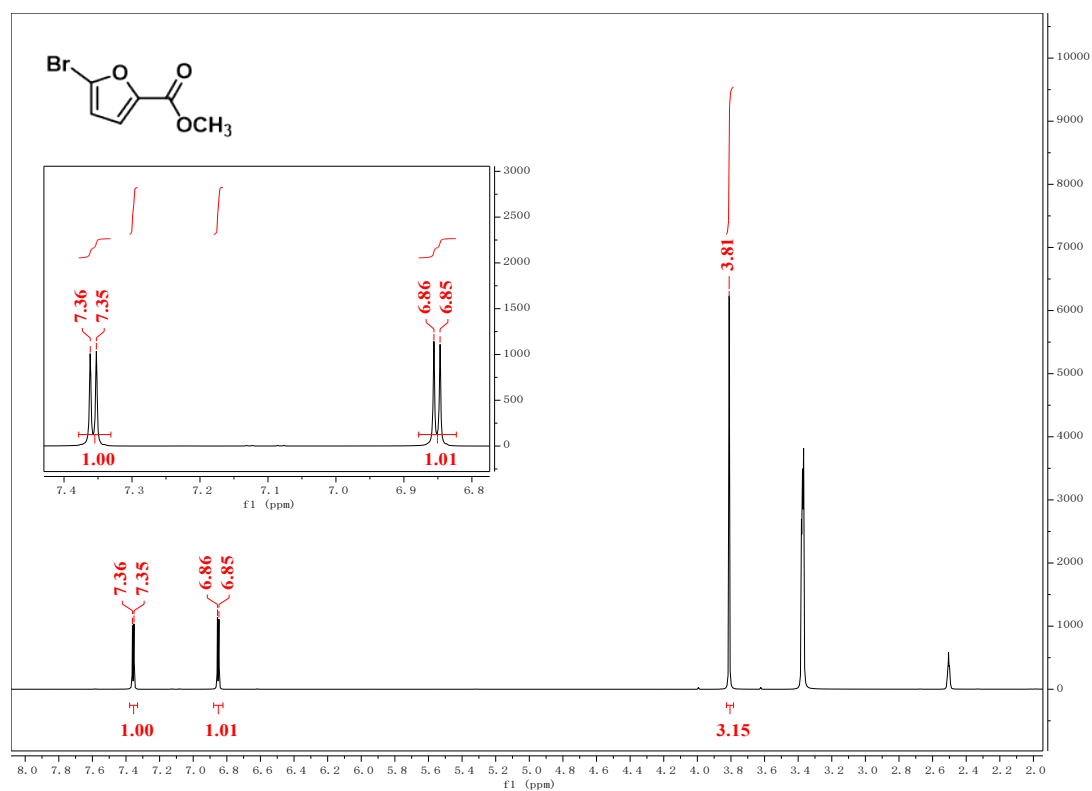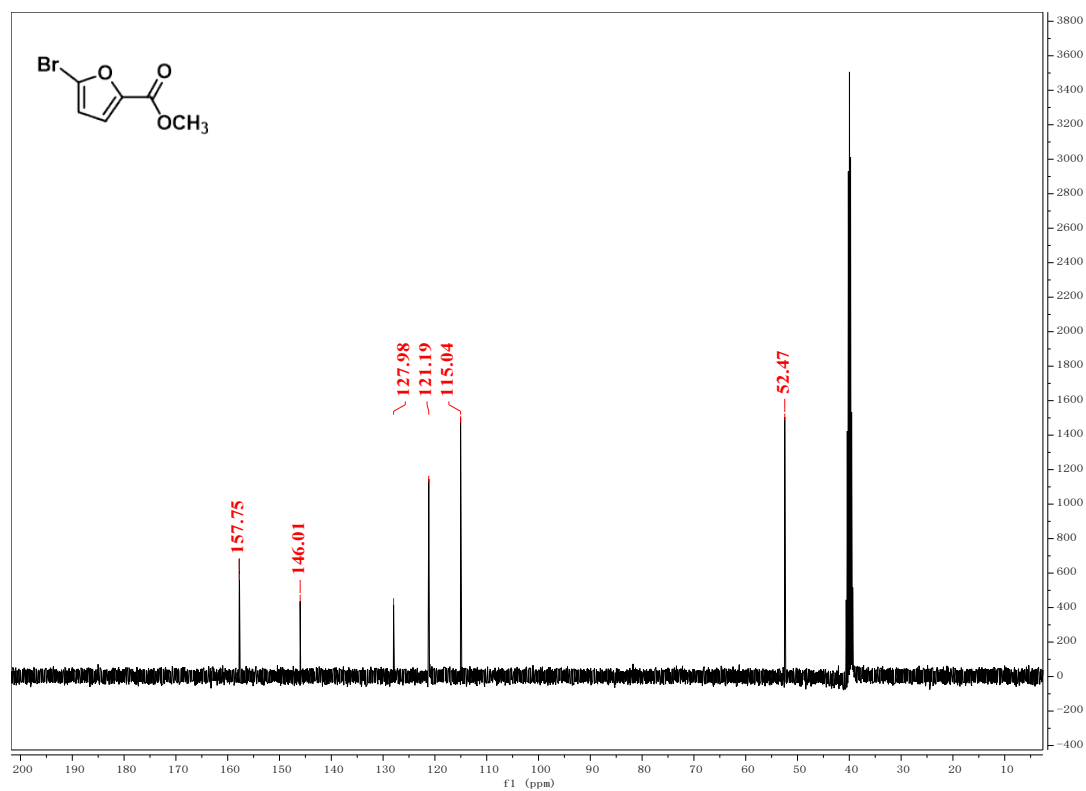

**Fig. S1** <sup>1</sup>H and <sup>13</sup>C NMR spectra of methyl 5-bromofuroate

<sup>1</sup>H NMR (400 MHz, DMSO-*d*<sub>6</sub>),  $\delta$  7.36 (d,  $J$  = 3.6 Hz, 1H), 6.85 (d,  $J$  = 3.6 Hz, 1H), 3.81 (s, 3H).

<sup>13</sup>C NMR (101 MHz, DMSO-*d*<sub>6</sub>),  $\delta$  157.75, 146.01, 127.98, 121.19, 115.04, 52.47.

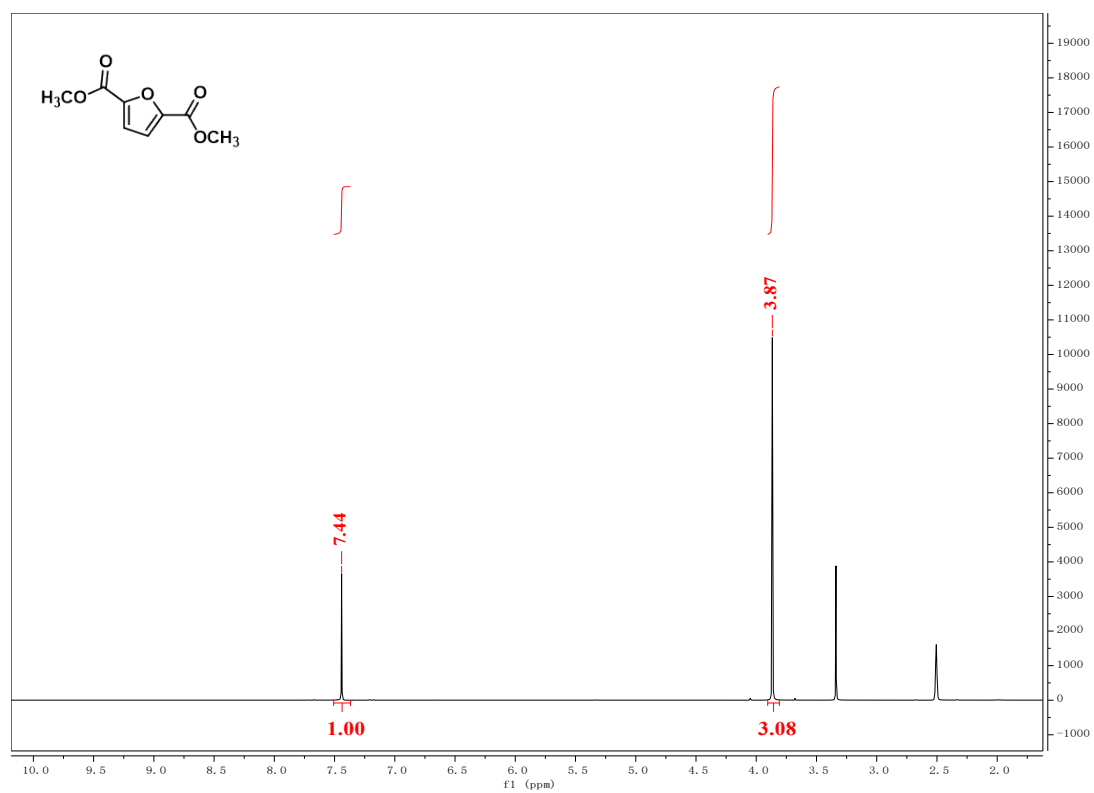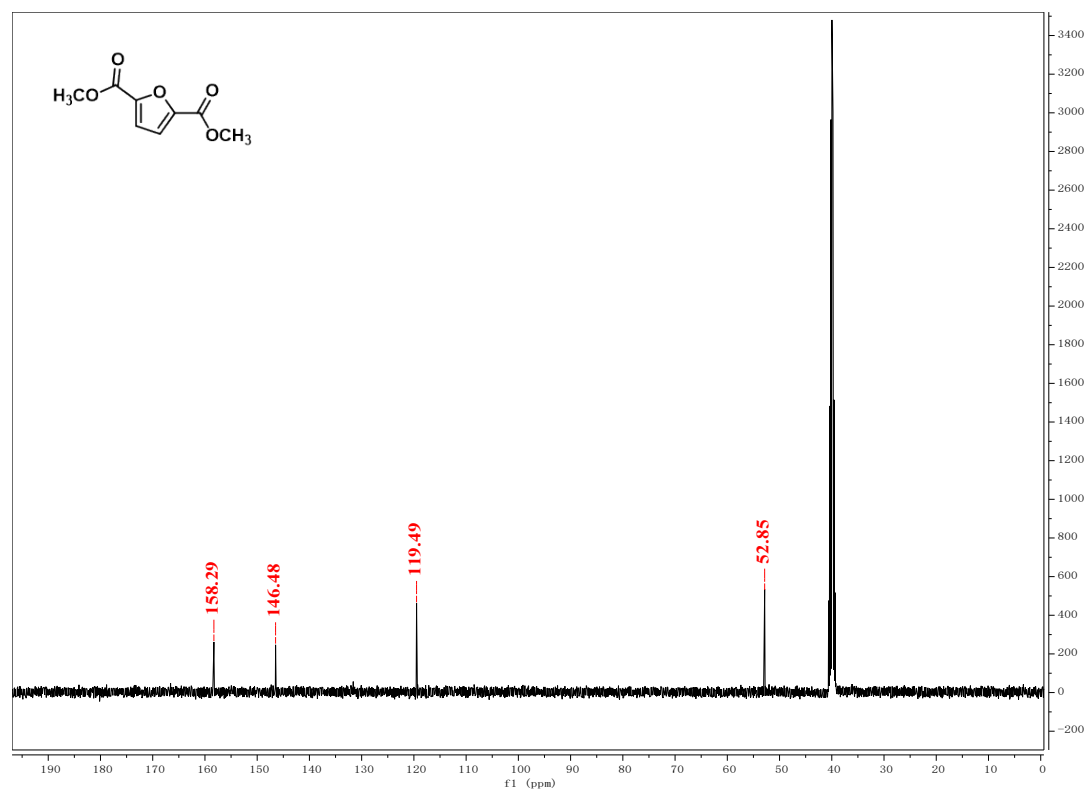

**Fig. S2** <sup>1</sup>H and <sup>13</sup>C NMR spectra of DMFD

<sup>1</sup>H NMR (400 MHz, DMSO-*d*<sub>6</sub>),  $\delta$  7.44 (s, 1H), 3.87 (s, 3H).

<sup>13</sup>C NMR (101 MHz, DMSO-*d*<sub>6</sub>),  $\delta$  158.29, 146.48, 119.49, 52.85.

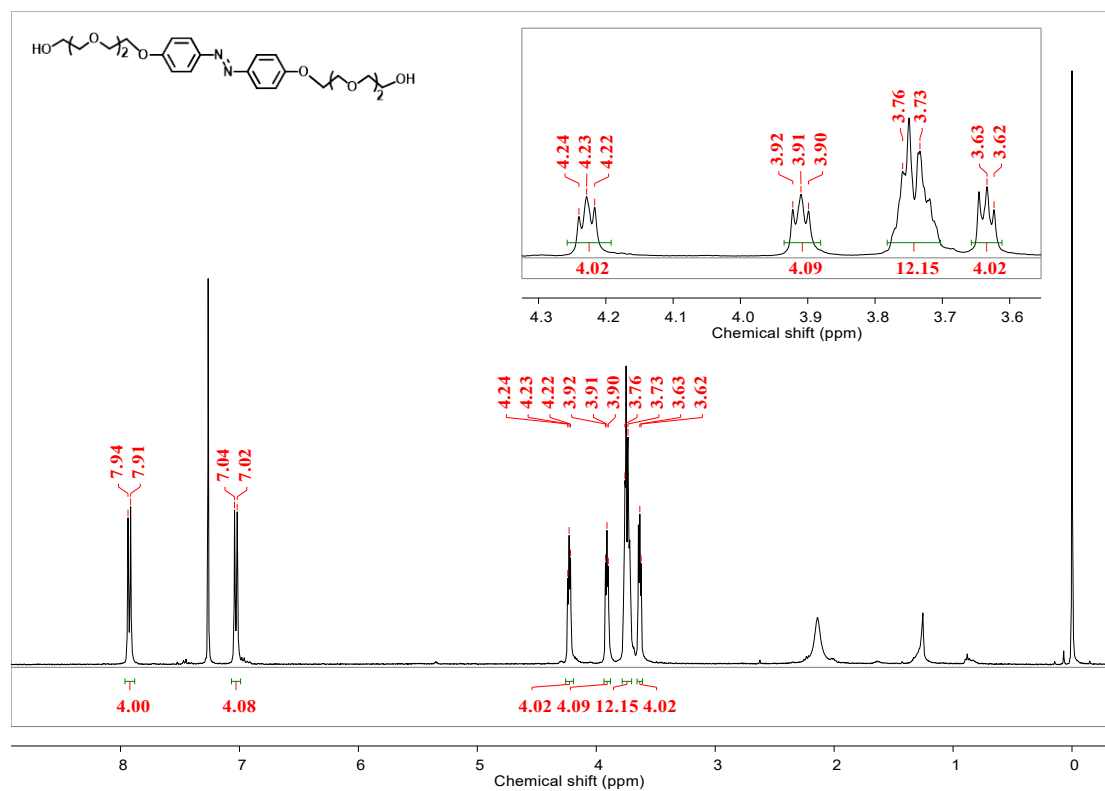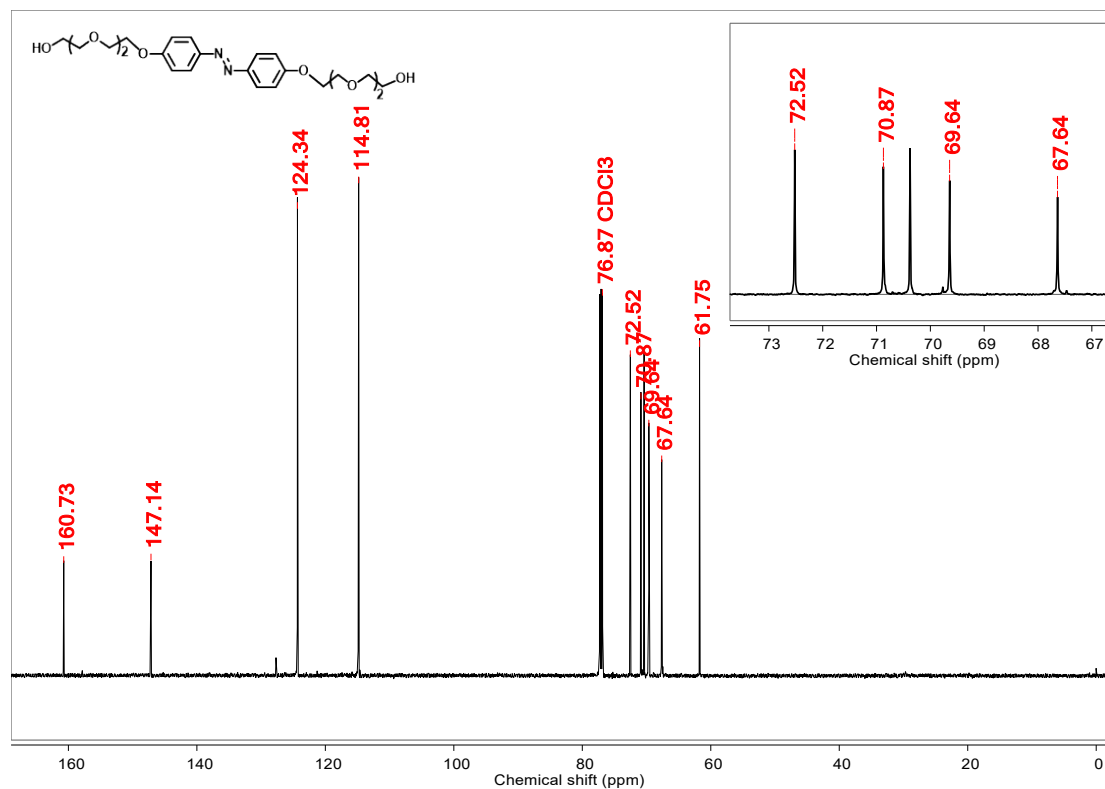

**Fig. S3** <sup>1</sup>H and <sup>13</sup>C NMR spectra of Azo-C<sub>12</sub>

<sup>1</sup>H NMR (400 MHz, CDCl<sub>3</sub>),  $\delta$  7.94–7.91 (d,  $J$  = 8.9 Hz, 4H, Ar–N), 7.04–7.02 (d,  $J$  = 12.1 Hz, 4H, Ar–O), 4.24–4.22 (t, 4H, Ar–O–CH<sub>2</sub>), 3.92–3.90 (t, 4H, –CH<sub>2</sub>O), 3.77–3.62 (m, 16H, CH<sub>2</sub>CH<sub>2</sub>–O–CH<sub>2</sub>CH<sub>2</sub>).

<sup>13</sup>C NMR (101 MHz, CDCl<sub>3</sub>),  $\delta$  160.7, 147.2, 124.3, 114.8, 76.8, 72.5, 70.9, 69.6, 67.6, 61.8.

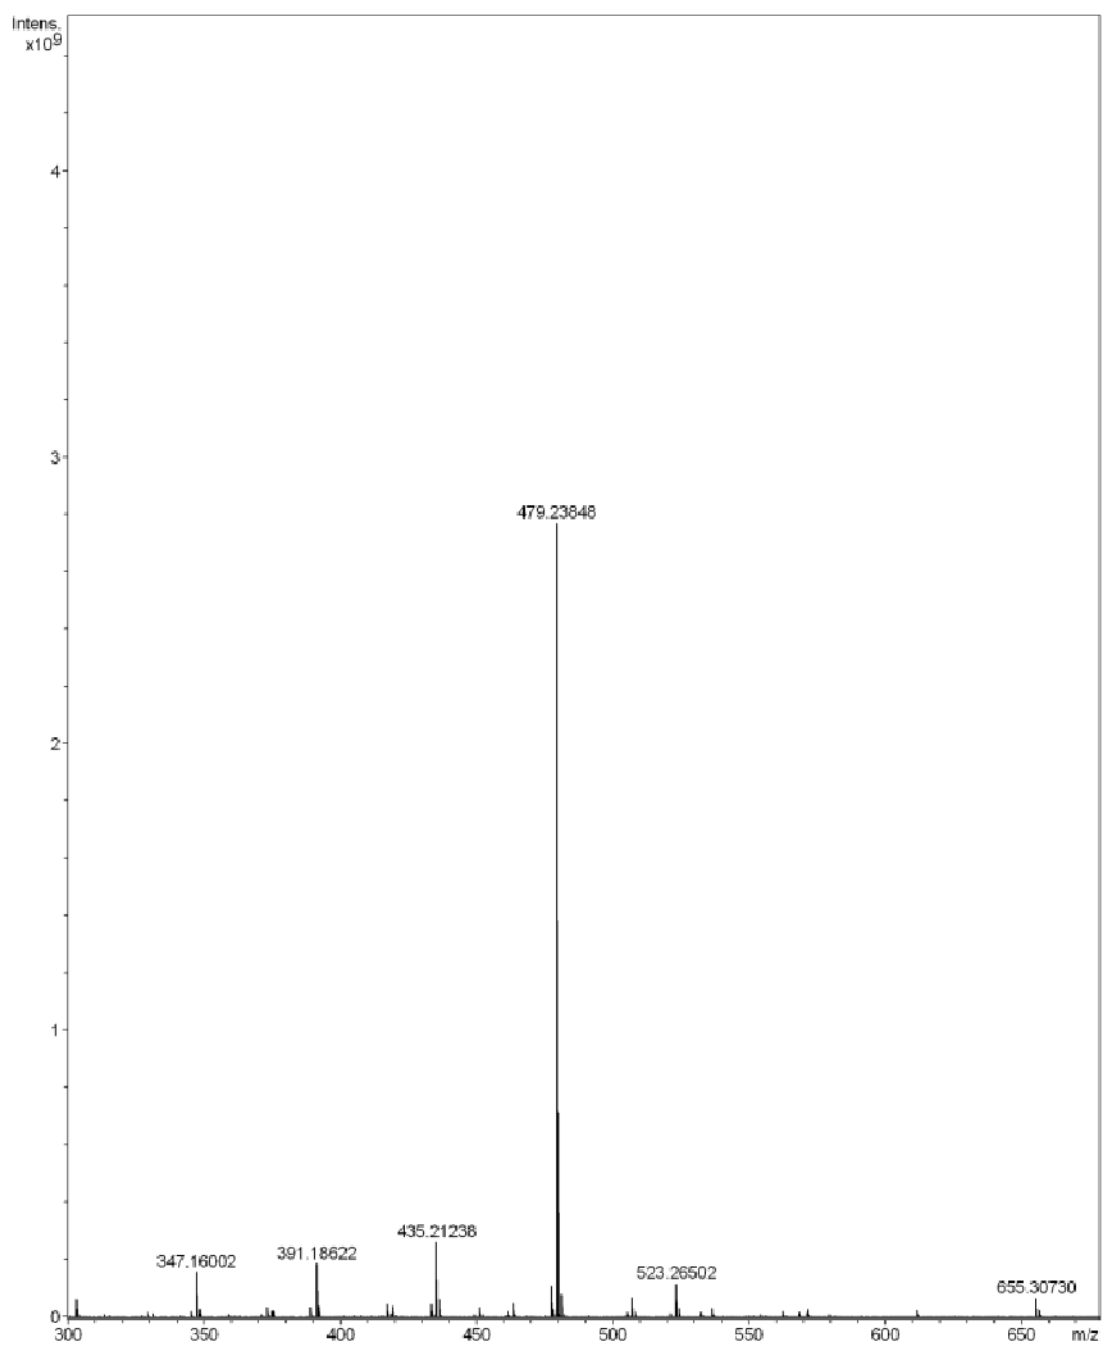

**Fig. S4** ESI-MS spectrum of Azo-C<sub>12</sub>

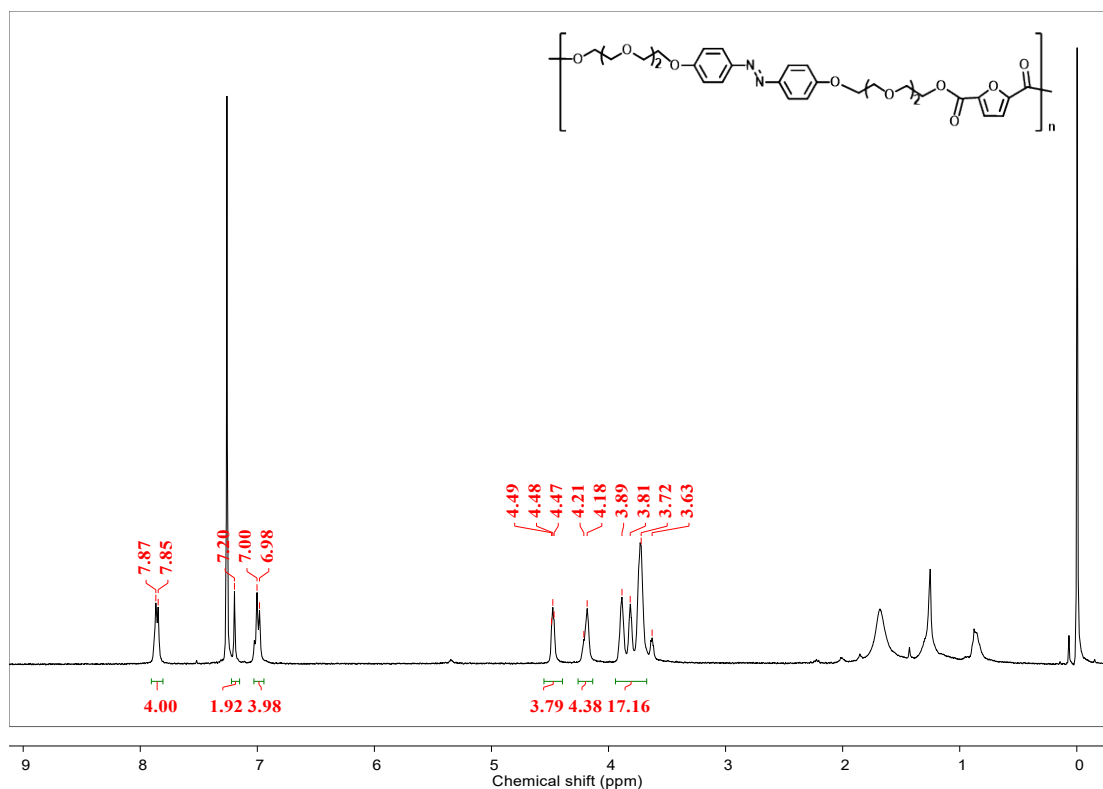

**Fig. S5**  $^1\text{H}$  NMR spectrum of PAzo-DMFD

$^1\text{H}$  NMR (400MHz  $\text{CDCl}_3$ ):  $\delta$  7.87–7.85 (m, 4H, Ar–N), 7.20 (s, 2H, furan ring), 7.03–6.98 (t, 4H, Ar–O), 4.49–4.47 (m, 4H, Ar–O– $\text{CH}_2$ ), 4.21–4.18 (m, 4H,  $-\text{CH}_2\text{O}$ ), 3.89–3.63 (m, 16H,  $-\text{CH}_2\text{CH}_2-\text{O}-\text{CH}_2\text{CH}_2-$ ).

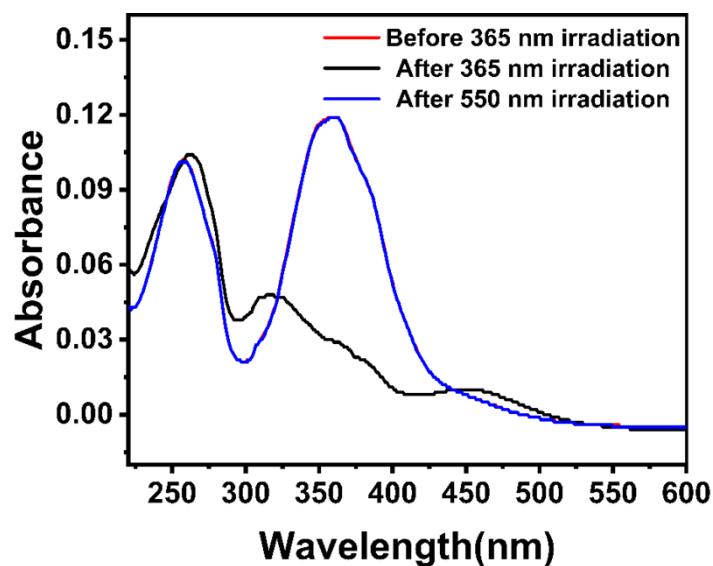

**Fig. S6** UV-vis spectra of PAzo-DMFD film before and after UV light (365 nm,  $25 \text{ mW}\cdot\text{cm}^{-2}$ , 10 min) and then visible light (550 nm,  $10 \text{ mW}\cdot\text{cm}^{-2}$ , 10 min) irradiations.

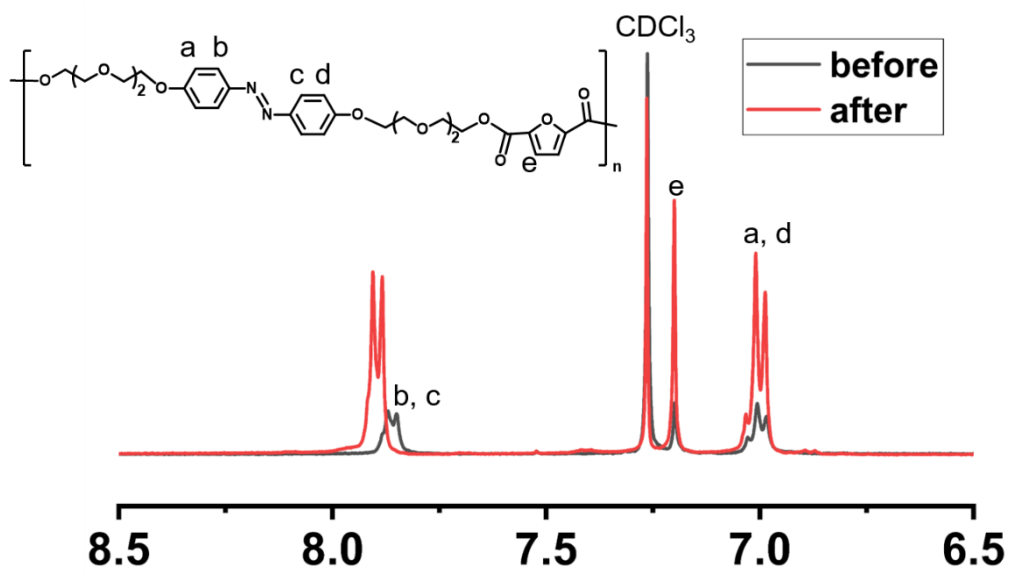

**Fig. S7**  $^1\text{H-NMR}$  spectra of PAzo-DMFD in  $\text{CDCl}_3$  before (black) and after (red) 365 nm UV irradiation.

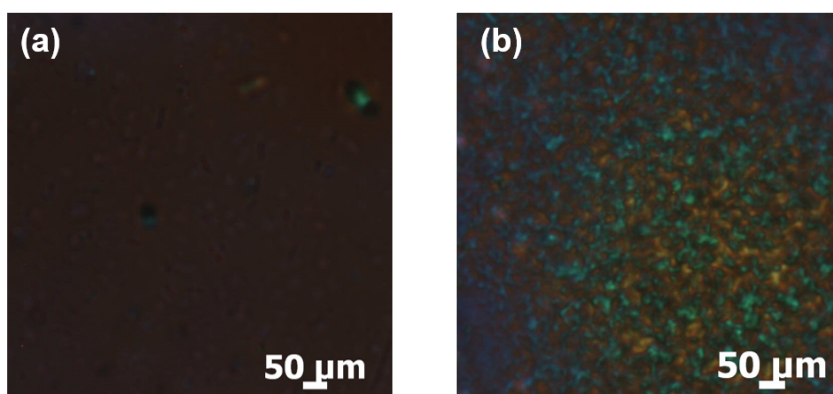

**Fig. S8** POM images of a very thin sample of PAzo-DMFD (a) upon UV light irradiation ( $25 \text{ mW}\cdot\text{cm}^{-2}$ , 60 min) at  $50 \text{ }^\circ\text{C}$ , (b) upon heating to  $120 \text{ }^\circ\text{C}$  and then cooling to  $50 \text{ }^\circ\text{C}$  after UV irradiation.
